# Supplementary material for: A zwitterionic salt–cocrystal: in vitro insights from niraparib tosylate, an anti-cancer drug
Source: Royal Society of Chemistry journal article supplement (doi:10.1039/d4ce00114a), 2024-01-01
Supplement: d4ce00114a1.pdf [file d4ce00114a1.pdf]

## **Supporting information**

### **A Zwitterionic Salt-Cocrystal: *In-Vitro* Insights from Niraparib Tosylate an Anti-Cancer Drug**

Ramesh Reddy Mudda,<sup>a</sup> Ramesh Devarapalli,<sup>a</sup> Arijit Das,<sup>a</sup> L. Pulla Reddy,<sup>a</sup> C. Malla Reddy,<sup>b,c,\*</sup> Ramanaiah Chennuru.<sup>a\*</sup>

<sup>a</sup>Centre of Excellence Polymorphism, Research and Development, Integrated Product Development (IPD), Cipla Ltd., Bangalore, India.

<sup>b</sup>Department of Chemistry, Indian Institute of Technology Hyderabad, Hyderabad, Telangana, 502285, India

<sup>c</sup>Department of Chemical Sciences, Indian Institute of Science Education and Research (IISER) Kolkata, Mohanpur Campus, Mohanpur 741 246, India.

---

\*Corresponding authors

Dr. Ramanaiah Chennuru

Centre of Excellence Polymorphism, Research and Development, Integrated Product Development (IPD), Cipla Ltd., Virgonagar, Bangalore-560 049, Karnataka, India.

Email: [Ramanaiah.Chennuru@Cipla.com](mailto:Ramanaiah.Chennuru@Cipla.com)

Contact No: +91-80-46912332. Fax No: +91-80-28472795.

and

Prof. C. Malla Reddy

Department of Chemistry, Indian Institute of Technology Hyderabad, Hyderabad, Telangana, 502285, India

Department of Chemical Sciences, Indian Institute of Science Education and Research (IISER) Kolkata, Mohanpur Campus, Mohanpur 741 246, India.

Phone: (c) +91-9830370458

E-mail: [cmreddy@chy.iith.ac.in](mailto:cmreddy@chy.iith.ac.in), [cmallareddy@gmail.com](mailto:cmallareddy@gmail.com)

**Table of contents:**

**Figure S1:** Powder X-ray Diffraction pattern of NIR.TOS.H<sub>2</sub>O (Form I).

**Figure S2:** Powder X-ray Diffraction pattern of NIR.TOS.PRO.

**Figure S3.** <sup>1</sup>H-NMR spectra comparison of NIR.TOS.PRO with its starting materials NIR.TOS.H<sub>2</sub>O and L-proline.

**Table S1:** Experimental polymorph screening details.

**Table S2:** Experimental cocrystal screening details.

**Figure S4:** PXRD pattern of new polymorph in comparison with NIR.TOS.H<sub>2</sub>O.

**Figure S5:** PXRD pattern of new polymorph in comparison with Form II of Niraparib tosylate.

**Figure S6:** PXRD pattern of new polymorph in comparison with Form III of Niraparib tosylate.

**Figure S7:** DSC & TGA overlay of new polymorph of Niraparib tosylate.

**Figure S8.** ORTEP representation of NIR.TOS.H<sub>2</sub>O.

**Figure S9.** ORTEP representation of NIR.TOS.PRO.

**Figure S10.** Experimental and simulated PXRD patterns of NIR.TOS.PRO with one-to one correspondence.

**Figure S11:** Powder X-ray diffraction patterns of NIR.TOS.PRO in pH 1.2, 4.5 and 6.8 buffers.

**Figure S12:** Overlay of powder X-ray diffraction patterns of stability samples of NIR.TOS.PRO in comparison with the input.

**Table S3:** Torsion angles that are majorly deviated in NIR.TOS.H<sub>2</sub>O and NIR.TOS.PRO.

**Table S4:** Hydrogen bond parameters of NIR.TOS.H<sub>2</sub>O and NIR.TOS.PRO.

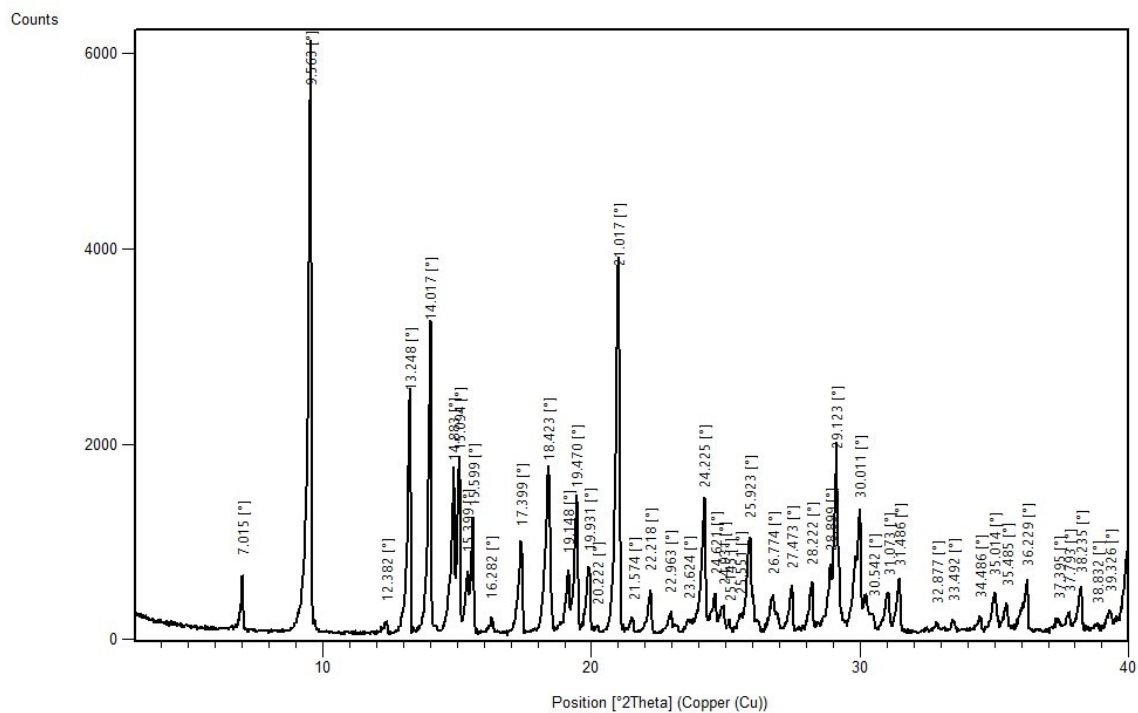

**Figure S1:** Powder X-ray Diffraction pattern of NIR.TOS.H<sub>2</sub>O (Form I).

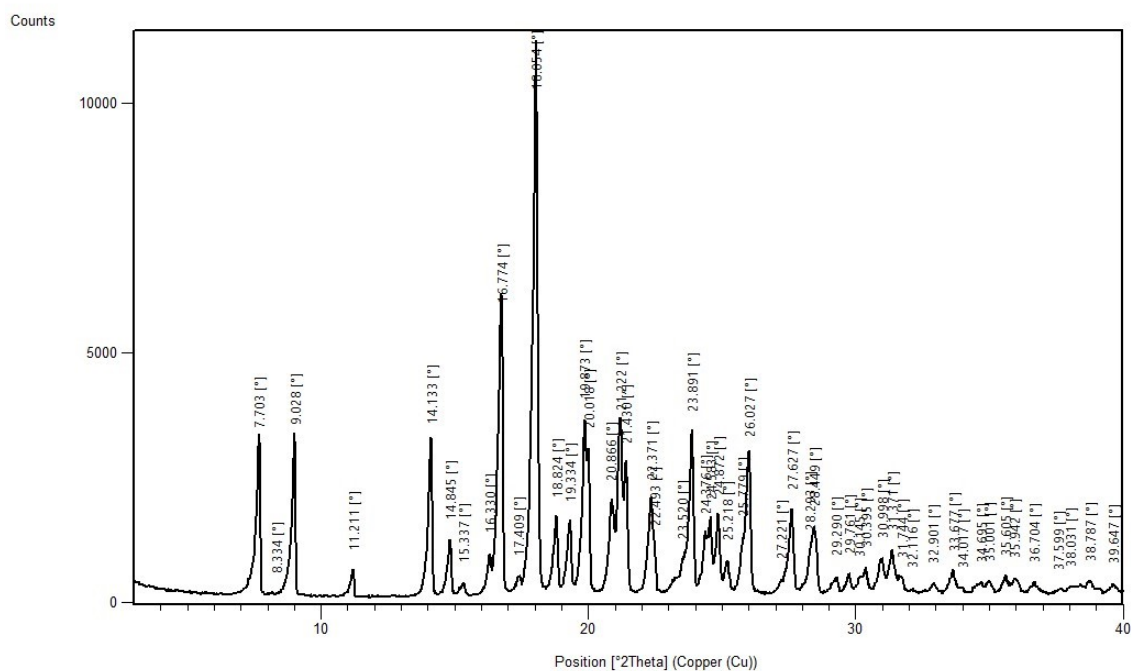

**Figure S2:** Powder X-ray Diffraction pattern of NIR.TOS.PRO (Zwitterionic salt-cocrystal).

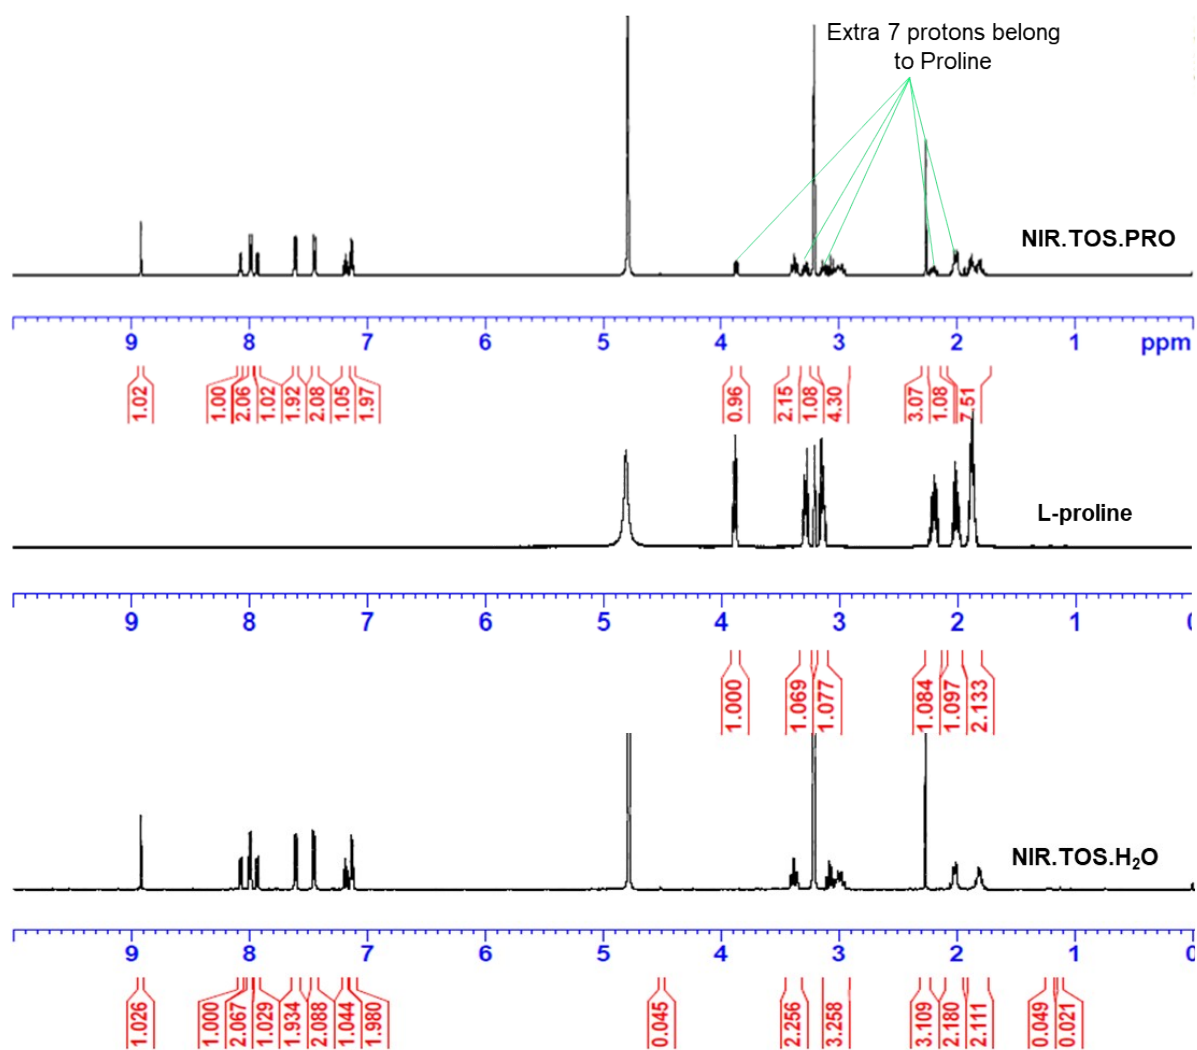

**Figure S3.** <sup>1</sup>H-NMR spectra comparison of NIR.TOS.PRO with its starting materials NIR.TOS.H<sub>2</sub>O and L-proline.

**Table S1:** Experimental polymorph screening details.

| Slurry crystallization |            |                        |            |                             |
|------------------------|------------|------------------------|------------|-----------------------------|
| S. No.                 | Input Form | Solvent                | Temp. (°C) | Result                      |
| 1                      | Amorphous  | 1,2-Dimethoxy ethane   | 45-50      | Form I                      |
| 2                      | Form I     | 1,2-Dimethoxyethane    | 45-50      | Form I                      |
| 3                      | Amorphous  | 1,2-Propanediol        | 0-5        | Form I                      |
| 4                      | Amorphous  | 1,4-Dioxane            | 0-5        | Form I                      |
| 5                      | Form I     | 1,4-Dioxane            | 25-30      | Form I                      |
| 6                      | Form I     | 1,4-Dioxane            | 45-50      | Form I                      |
| 7                      | Form I     | 2,2,2-Trifluoroethanol | 35-40      | Solid material not isolated |
| 8                      | Amorphous  | 2-Butanol              | 35-40      | Form I                      |
| 9                      | Form I     | 2-Butanol              | 60-65      | Form I                      |

|    |           |                                                  |           |                                |
|----|-----------|--------------------------------------------------|-----------|--------------------------------|
| 10 | Amorphous | 2-Methoxy ethanol                                | 0-5       | Form I                         |
| 11 | Form I    | 2-Methoxyethanol                                 | 45-50     | Form I                         |
| 12 | Amorphous | 2-Methyl Tetrahydrofuran                         | 0-5       | Form I                         |
| 13 | Form I    | 2-Methyl Tetrahydrofuran                         | 45-50     | Form I                         |
| 14 | Form I    | 2-Pentanol                                       | 35-40     | Form I                         |
| 15 | Form I    | Acetic Acid                                      | 25-30     | Form I                         |
| 16 | Form I    | Acetone + water                                  | 25-30     | Form I                         |
| 17 | Form I    | Acetone + water                                  | 70-75     | Form I                         |
| 18 | Amorphous | Acetonitrile                                     | 25-30     | Form I                         |
| 19 | Amorphous | Acetonitrile                                     | 65-70     | Form I                         |
| 20 | Form I    | Acetonitrile                                     | 35-40     | Form I                         |
| 21 | Form I    | Acetonitrile                                     | 70-75     | Form I                         |
| 22 | Form I    | Acetonitrile + 2-butanol                         | 70-75     | Form I                         |
| 23 | Form I    | Acetonitrile + 2-butanol +<br>Dimethyl sulfoxide | 70-75     | Form I                         |
| 24 | Amorphous | Anisole                                          | 0-5       | Form I                         |
| 25 | Form I    | Benzyl alcohol                                   | 35-40     | Solid material<br>not isolated |
| 26 | Form I    | Benzyl alcohol                                   | -5 to -10 | Form I                         |
| 27 | Amorphous | Chloroform                                       | 0-5       | Form I                         |
| 28 | Amorphous | Dichloromethane                                  | 0-5       | Form I                         |
| 29 | Amorphous | Dichloromethane                                  | 25-30     | Form I                         |
| 30 | Amorphous | Diethyl ether                                    | 10-15     | Form I                         |
| 31 | Amorphous | Diethyl ether                                    | -5 to -20 | Form I                         |
| 32 | Form I    | Diethylene glycol                                | 35-40     | Solid material<br>not isolated |
| 33 | Amorphous | Di isopropyl ether                               | 0-5       | Form I                         |
| 34 | Amorphous | Di isopropyl ether                               | 25-30     | Form I                         |
| 35 | Amorphous | Dimethoxymethane                                 | 0-5       | Form I                         |
| 36 | Form I    | Dimethoxymethane                                 | 25-30     | Form I                         |
| 37 | Form I    | Ethanol                                          | 0-5       | Form I                         |
| 38 | Form I    | Ethanol                                          | 35-40     | Form I                         |
| 39 | Amorphous | Ethanol + 1,4-Dioxane                            | 25-30     | Form I                         |
| 40 | Form I    | Ethanol + water                                  | 50-55     | Form I                         |
| 41 | Amorphous | Ethylene glycol mono propyl ether                | 0-5       | Form I                         |
| 42 | Form I    | Formic Acid                                      | 25-30     | Form I                         |
| 43 | Form I    | Glycerol                                         | 35-40     | Form I                         |
| 44 | Amorphous | Heptane                                          | 0-5       | Form I                         |
| 45 | Amorphous | Heptane                                          | 25-30     | Form I                         |
| 46 | Amorphous | Heptane                                          | 65-70     | Form I                         |
| 47 | Amorphous | Heptane + Acetonitrile                           | 25-30     | Form I                         |
| 48 | Form I    | Heptane + Acetonitrile                           | 25-30     | Form I                         |
| 49 | Amorphous | Heptane + Acetonitrile                           | 55-60     | Form I                         |

|    |           |                                 |           |        |
|----|-----------|---------------------------------|-----------|--------|
| 50 | Form I    | Hexanoic acid                   | 35-40     | Form I |
| 51 | Amorphous | Isobutyl acetate                | 25-30     | Form I |
| 52 | Form I    | Isobutyl acetate                | 55-60     | Form I |
| 53 | Form I    | Isopropanol                     | 25-30     | Form I |
| 54 | Form I    | Isopropanol                     | 55-60     | Form I |
| 55 | Form I    | Methanol                        | 45-50     | Form I |
| 56 | Amorphous | Methanol                        | -5-0      | Form I |
| 57 | Amorphous | Petroleum ether                 | 25-30     | Form I |
| 58 | Amorphous | Petroleum ether                 | -5 to -10 | Form I |
| 59 | Amorphous | Petroleum ether + Acetonitrile  | 25-30     | Form I |
| 60 | Amorphous | Petroleum ether + Acetonitrile  | -5 to -10 | Form I |
| 61 | Amorphous | Petroleum ether + Ethyl acetate | 25        | Form I |
| 62 | Amorphous | Petroleum ether + Heptane       | 25-30     | Form I |
| 63 | Form I    | pH 4.5 buffer                   | 25-30     | Form I |
| 64 | Amorphous | pH 4.5 buffer                   | 25-30     | Form I |
| 65 | Form I    | pH 6.8 buffer                   | 25-30     | Form I |
| 66 | Form I    | Sulfolane                       | 35-40     | Form I |
| 67 | Form I    | Xylene                          | 95-100    | Form I |

### Recrystallization

| S. No. | Input Form | Solvent              | Temp. (°C) | Result                      |
|--------|------------|----------------------|------------|-----------------------------|
| 1      | Form I     | Dimethyl formamide   | 0-5        | Form I                      |
| 2      | Form I     | Dimethyl acetamide   | 0-5        | Form I                      |
| 3      | Form I     | Dimethyl sulfoxide   | 0-5        | Form I                      |
| 4      | Form I     | Methanol             | -20 to -25 | Form I                      |
| 5      | Form I     | Ethanol              | -20 to -25 | Form I                      |
| 6      | Form I     | Methanol + Ethanol   | -20 to -25 | Form I                      |
| 7      | Form I     | Methanol + DMSO      | 0-5        | Form I                      |
| 8      | Form I     | 2-Methoxy ethanol    | -20 to -25 | Form I                      |
| 9      | Form I     | 2-Ethoxy ethanol     | -20 to -25 | Form I                      |
| 10     | Form I     | N-Methyl pyrrolidine | 0-5        | Form I                      |
| 10     | Form I     | Acetic acid          | -20 to -25 | Form I                      |
| 11     | Form I     | Formic acid          | -20 to -25 | Solid material not isolated |

### Normal anti-solvent addition

| S. No. | Input Form | Solvent               | Anti-solvent                    | Temp. (°C) | Result |
|--------|------------|-----------------------|---------------------------------|------------|--------|
| 1      | Form I     | Acetic acid           | n-Heptane                       | 40-45      | Form I |
| 2      | Form I     | Acetic Acid           | n-Heptane                       | -10 to -15 | Form I |
| 3      | Form I     | Acetic acid + Ethanol | Methyl tertiary butyl ether     | 25-30      | Form I |
| 4      | Amorphous  | Benzyl alcohol        | Dichloromethane + Ethyl acetate | 0-5        | Form I |
| 5      | Form I     | Dimethyl sulfoxide    | Acetone                         | 0-5        | Form I |

|    |           |                                 |                                       |           |        |
|----|-----------|---------------------------------|---------------------------------------|-----------|--------|
| 6  | Form I    | Dimethyl sulfoxide + Ethanol    | Methyl tertiary butyl ether           | -5 to -10 | Form I |
| 7  | Form I    | Dimethyl sulfoxide + Methanol   | Methyl tertiary butyl ether           | 25-30     | Form I |
| 8  | Amorphous | Formic acid                     | Acetone + Methyl tertiary butyl ether | 25-30     | Form I |
| 9  | Form I    | Formic acid                     | Hexane + Methyl tertiary butyl ether  | 70-75     | Form I |
| 10 | Form I    | N-Methyl pyrrolidine            | Acetone                               | 0-5       | Form I |
| 11 | Form I    | Ethanol                         | Acetone                               | 0-5       | Form I |
| 12 | Form I    | N-Methyl pyrrolidine + Methanol | Methyl tertiary butyl ether           | 25-30     | Form I |
| 13 | Form I    | Trichloroacetic acid            | Heptane + Methyl tertiary butyl ether | 70-75     | Form I |
| 14 | Form I    | Trichloroacetic acid            | Methyl tertiary butyl ether           | 70-75     | Form I |
| 15 | Form I    | Trifluoroethanol                | Methyl tertiary butyl ether           | -5 to -10 | Form I |
| 16 | Form I    | Methanol                        | Methyl tertiary butyl ether           | 25-30     | Form I |
| 17 | Form I    | Methanol                        | Diethyl ether                         | 25-30     | Form I |
| 18 | Form I    | Trifluoroethanol + Methanol     | Methyl tertiary butyl ether           | 25-30     | Form I |

**Reverse antisolvent addition**

| S. No. | Input Form | Anti-solvent                             | Solvent              | Temp. (°C) | Result |
|--------|------------|------------------------------------------|----------------------|------------|--------|
| 1      | Form I     | 1,4-Dioxane                              | Acetic acid          | -10 to -15 | Form I |
| 2      | Form I     | 1,4-Dioxane                              | Dimethyl acetamide   | -10 to -20 | Form I |
| 3      | Form I     | 1,4-dioxane + Chloroform                 | Formamide            | 65-70      | Form I |
| 4      | Form I     | Chloroform                               | Dimethyl acetamide   | 65-70      | Form I |
| 5      | Form I     | Chloroform + Methyl tertiary butyl ether | Dimethyl acetamide   | 65-70      | Form I |
| 6      | Form I     | Dichloromethane                          | Dimethyl sulfoxide   | -15 to -20 | Form I |
| 7      | Form I     | Dichloromethane + acetonitrile           | N-Methyl pyrrolidine | 50-55      | Form I |
| 8      | Form I     | Dichloromethane + Acetonitrile           | Formamide            | 50-55      | Form I |
| 9      | Form I     | Diethyl ether                            | Dimethyl sulfoxide   | -15 to -20 | Form I |
| 10     | Form I     | Dimethyl carbonate                       | 2-Methoxyethanol     | 65-70      | Form I |

|    |        |                             |                           |            |        |
|----|--------|-----------------------------|---------------------------|------------|--------|
| 11 | Form I | Heptane                     | Ethanol + Methanol        | 0-5        | Form I |
| 12 | Form I | Methyl tertiary butyl ether | Acetic acid + 1,4-Dioxane | -10 to -15 | Form I |
| 13 | Form I | Methyl tertiary butyl ether | Dimethyl acetamide        | -10 to -15 | Form I |
| 14 | Form I | n-Heptane                   | Methanol + 1,4-Dioxane    | -15 to -20 | Form I |
| 15 | Form I | Toluene                     | Dimethyl sulfoxide        | 65-70      | Form I |
| 16 | Form I | Vinyl acetate               | 2-Methoxyethanol          | 65-70      | Form I |
| 17 | Form I | Water                       | Benzyl alcohol            | 0-5        | Form I |
| 18 | Form I | Xylene                      | Formamide                 | 65-70      | Form I |

### Reactive crystallization

| S. No. | Input Form          | PTSA (mole eqv.) | Solvent                       | Antisolvent                 | Temp. (°C) | Result |
|--------|---------------------|------------------|-------------------------------|-----------------------------|------------|--------|
| 1      | Niraparib free base | 1                | 1,2 Dichloroethane + Methanol | Heptane                     | -15 to -20 | Form I |
| 2      | Niraparib free base | 1                | 1,2 Propanediol               | Methyl tertiary butyl ether | 50-55      | Form I |
| 3      | Niraparib free base | 1                | 1,2 Propanediol               | Water                       | 0-5        | Form I |
| 4      | Niraparib free base | 1                | 1,2 Propanediol               | Heptane                     | -15 to -20 | Form I |
| 5      | Niraparib free base | 1                | 1,4 Dioxane                   | NA                          | 50-55      | Form I |
| 6      | Niraparib free base | 1                | 1,4 Dioxane                   | NA                          | 0-5        | Form I |
| 7      | Niraparib free base | 1                | 1,4-Dioxane + Ethanol         | Heptane                     | -5 to -10  | Form I |
| 8      | Niraparib free base | 1                | 2-Hexanone                    | Heptane                     | -5 to -10  | Form I |
| 9      | Niraparib free base | 1                | Acetone + Acetic acid         | NA                          | 25-30      | Form I |
| 10     | Niraparib free base | 1                | Acetonitrile + 1,4 Dioxane    | Ethanol + Water             | 25-80      | Form I |
| 11     | Niraparib free base | 1                | Anisole + Ethanol             | Heptane                     | -5 to -10  | Form I |
| 12     | Niraparib free base | 1                | Ethanol                       | NA                          | 50-55      | Form I |
| 13     | Niraparib free base | 1                | Ethanol                       | NA                          | 0-5        | Form I |
| 14     | Niraparib free base | 2                | Ethanol                       | Heptane                     | 0-5        | Form I |
| 15     | Niraparib free base | 1.5              | Ethanol                       | NA                          | 0-5        | Form I |



|    |                     |     |                                  |                                       |            |                     |
|----|---------------------|-----|----------------------------------|---------------------------------------|------------|---------------------|
| 16 | Niraparib free base | 1.5 | Ethanol                          | Heptane                               | 0-5        | Form I              |
| 17 | Niraparib free base | 1   | Ethanol                          | Heptane                               | -15 to -20 | Form I              |
| 18 | Niraparib free base | 1   | Ethanol                          | n-Hexane                              | -15 to -20 | Form I              |
| 19 | Niraparib free base | 1   | Ethanol+1,4-Dioxane              | Heptane                               | -15 to -20 | Unstable novel form |
| 20 | Niraparib free base | 1   | Ethanol + Dichloromethane        | Heptane                               | -15 to -20 | Form I              |
| 21 | Niraparib free base | 1   | Ethyl formate + Ethanol          | Heptane                               | -15 to -20 | Form I              |
| 22 | Niraparib free base | 1   | Formic acid                      | Methyl tertiary butyl ether           | -5 to -10  | Form I              |
| 23 | Niraparib free base | 1   | Formic acid + Acetone            | Methyl tertiary butyl ether           | 0-5        | Form I              |
| 24 | Niraparib free base | 1   | Isopropyl acetate                | NA                                    | -15 to -20 | Form I              |
| 25 | Niraparib free base | 1   | MEK                              | Heptane                               | -15 to -20 | Form I              |
| 26 | Niraparib free base | 1   | Methanol                         | NA                                    | 25-30      | Form I              |
| 27 | Niraparib free base | 1   | Methanol                         | NA                                    | 60-65      | Form I              |
| 28 | Niraparib free base | 2   | Methanol                         | DIPE                                  | 0-5        | Form I              |
| 29 | Niraparib free base | 1   | Methanol                         | Methyl tertiary butyl ether + Heptane | 0-5        | Form I              |
| 30 | Niraparib free base | 1   | Methanol                         | n-Hexane                              | -15 to -20 | Form I              |
| 31 | Niraparib free base | 1   | Methyl isobutyl ketone           | NA                                    | -15 to -20 | Form I              |
| 32 | Niraparib free base | 1   | Methyl isobutyl ketone           | Heptane                               | -15 to -20 | Form I              |
| 33 | Niraparib free base | 0.5 | Methyl isobutyl ketone           | Heptane                               | -15 to -20 | Form I              |
| 34 | Niraparib free base | 1   | Methyl isobutyl ketone           | Heptane                               | 25-30      | Form I              |
| 35 | Niraparib free base | 1   | Methyl isobutyl ketone + Ethanol | Heptane                               | -15 to -20 | Form I              |
| 36 | Niraparib free base | 1   | Nitromethane                     | Heptane                               | -15 to -20 | Form I              |
| 37 | Niraparib free base | 1   | Tetrahydrofuran + Acetone        | Heptane                               | -15 to -20 | Form I              |

|    |                     |   |                  |         |            |        |
|----|---------------------|---|------------------|---------|------------|--------|
| 38 | Niraparib free base | 1 | Trifluoroethanol | Heptane | -15 to -20 | Form I |
|----|---------------------|---|------------------|---------|------------|--------|

**Table S2:** Experimental cocrystal screening details.

| <b>Cocrystallization</b> |                   |                            |                  |                        |                             |                   |               |
|--------------------------|-------------------|----------------------------|------------------|------------------------|-----------------------------|-------------------|---------------|
| <b>S. No.</b>            | <b>Input Form</b> | <b>Coformer</b>            | <b>Mole eqv.</b> | <b>Solvent</b>         | <b>Antisolvent</b>          | <b>Temp. (°C)</b> | <b>Result</b> |
| 1                        | Form I            | 2,5-Dihydroxy benzoic acid | 1                | Methanol               | NA                          | 25-30             | Form I        |
| 2                        | Form I            | 2,5-Dihydroxy benzoic acid | 2                | Isopropanol            | NA                          | 25-30             | PM            |
| 3                        | Form I            | 2,5-Dihydroxy benzoic acid | 1.2              | Ethyl acetate          | NA                          | 25-30             | PM            |
| 4                        | Form I            | 2,5-Dihydroxy benzoic acid | 2                | Methanol               | NA                          | 50-55             | PM            |
| 5                        | Form I            | 2,5-Dihydroxy benzoic acid | 2                | Tetrahydrofuran        | NA                          | 35-40             | PM            |
| 6                        | Form I            | 2,5-Dihydroxy benzoic acid | 1                | Acetone                | NA                          | 35-40             | PM            |
| 7                        | Form I            | Benzoic acid               | 2                | 2,2,2-Trifluoroethanol | Methyl tertiary butyl ether | 25-30             | PM            |
| 8                        | Form I            | Benzoic acid               | 2                | Ethanol                | NA                          | 25-30             | Form I        |
| 9                        | Form I            | Benzoic acid               | 2                | Ethanol                | Ethyl acetate               | 25-30             | PM            |
| 10                       | Form I            | Benzoic acid               | 3                | Ethanol                | Acetone                     | 25-30             | PM            |
| 11                       | Form I            | Aspartame                  | 1.2              | Isopropanol            | NA                          | 35-40             | PM            |
| 12                       | Form I            | Aspartame                  | 1                | Isopropanol            | NA                          | 70-75             | PM            |
| 13                       | Form I            | Aspartame                  | 1                | Ethyl acetate          | NA                          | 70-75             | PM            |
| 14                       | Form I            | Aspartame                  | 1                | Acetonitrile           | NA                          | 70-75             | PM            |
| 15                       | Form I            | Caffeine                   | 1                | Methanol               | NA                          | 55-60             | Form I        |
| 16                       | Form I            | Caffeine                   | 2                | Tetrahydrofuran        | NA                          | 45-50             | Form I        |
| 17                       | Form I            | Caffeine                   | 3                | Methanol               | Methyl tertiary butyl ether | 55-60             | PM            |
| 18                       | Form I            | Citric acid                | 1                | Acetone                | NA                          | 25-30             | Form I        |
| 19                       | Form I            | Citric acid                | 1.2              | Isopropyl acetate      | NA                          | 50-55             | Form I        |
| 20                       | Form I            | Citric acid                | 1                | Tetrahydrofuran        | NA                          | 25-30             | PM            |
| 21                       | Form I            | Citric acid                | 1                | Acetonitrile           | NA                          | -5-0              | PM            |
| 22                       | Form I            | D-Proline                  | 1                | Acetonitrile           | NA                          | 70-75             | Form I        |

|    |        |                 |     |                                 |                             |            |        |
|----|--------|-----------------|-----|---------------------------------|-----------------------------|------------|--------|
| 23 | Form I | D-Proline       | 2   | Methanol                        | Acetonitrile                | 70-75      | Form I |
| 24 | Form I | D-Tartaric acid | 1   | Acetone                         | NA                          | 25-30      | Form I |
| 25 | Form I | D-Tartaric acid | 2   | Methanol                        | NA                          | 25-30      | Form I |
| 26 | Form I | D-Tartaric acid | 1   | Methanol                        | Methyl tertiary butyl ether | 35-40      | PM     |
| 27 | Form I | Fumaric acid    | 1   | Methanol                        | NA                          | 35-40      | Form I |
| 28 | Form I | Fumaric acid    | 2   | Methanol                        | Methyl tertiary butyl ether | 35-40      | PM     |
| 29 | Form I | Fumaric acid    | 2   | Isobutanol                      | NA                          | 35-40      | PM     |
| 30 | Form I | Fumaric acid    | 2   | Ethyl acetate                   | NA                          | 35-40      | PM     |
| 31 | Form I | Fumaric acid    | 2   | Isopropyl acetate               | NA                          | 35-40      | PM     |
| 32 | Form I | L-Histidine     | 1.2 | Methanol + Acetonitrile         | NA                          | 60-65      | PM     |
| 33 | Form I | L-Histidine     | 1.2 | Ethanol + Acetonitrile          | NA                          | -15 to -20 | Form I |
| 34 | Form I | L-Aspartic acid | 1.2 | Acetonitrile                    | NA                          | 25-30      | PM     |
| 35 | Form I | L-Aspartic acid | 1.2 | Methanol + Acetonitrile + water | NA                          | 70-75      | Form I |
| 36 | Form I | L-Malic acid    | 3   | Methanol                        | NA                          | 25-30      | Form I |
| 37 | Form I | L-Malic acid    | 3   | Methanol + Acetone              | NA                          | 35-40      | Form I |
| 38 | Form I | L-Malic acid    | 3   | Isopropanol                     | NA                          | 50-55      | Form I |
| 39 | Form I | L-Malic acid    | 3   | Dichloromethane                 | NA                          | 25-30      | Form I |
| 40 | Form I | L-Malic acid    | 3   | Methanol                        | Methyl tertiary butyl ether | 35-40      | Form I |
| 41 | Form I | Methyl paraben  | 2   | 2,2,2-Trifluoroethanol          | Methyl tertiary butyl ether | 25-30      | PM     |
| 42 | Form I | Methyl paraben  | 2   | Ethanol                         | Ethyl acetate               | 25-30      | PM     |
| 43 | Form I | Methyl paraben  | 1   | Methanol                        | Acetonitrile                | 65-70      | PM     |
| 44 | Form I | Methyl paraben  | 2   | Acetonitrile                    | NA                          | 70-75      | PM     |
| 45 | Form I | Nicotinamide    | 2   | Ethanol                         | Ethyl acetate               | 25-30      | PM     |
| 46 | Form I | Nicotinamide    | 2   | Ethanol                         | NA                          | 25-30      | PM     |

|    |        |                       |     |                                                      |                             |            |        |
|----|--------|-----------------------|-----|------------------------------------------------------|-----------------------------|------------|--------|
| 47 | Form I | Nicotinamide          | 2   | Acetonitrile                                         | NA                          | 25-30      | Form I |
| 48 | Form I | Nicotinamide          | 1   | Methanol                                             | Acetonitrile                | 70-75      | Form I |
| 49 | Form I | Nicotinamide          | 1   | Methanol                                             | n-Heptane                   | 65-70      | Form I |
| 50 | Form I | Nicotinamide          | 3   | Acetonitrile                                         | NA                          | 70-75      | Form I |
| 51 | Form I | Oxalic acid dihydrate | 1   | Methanol                                             | NA                          | 25-30      | Form I |
| 52 | Form I | Oxalic acid dihydrate | 1.2 | Ethanol                                              | NA                          | 30-35      | Form I |
| 53 | Form I | Oxalic acid dihydrate | 3   | Ethanol                                              | NA                          | -15 to -10 | PM     |
| 54 | Form I | Oxalic acid dihydrate | 3   | Methanol                                             | n-Butyl acetate             | 0-5        | PM     |
| 55 | Form I | Succinic acid         | 1   | Methanol                                             | NA                          | 35-40      | Form I |
| 56 | Form I | Succinic acid         | 2   | Ethanol                                              | NA                          | 35-40      | PM     |
| 57 | Form I | Succinic acid         | 2   | Isopropanol                                          | NA                          | 35-40      | PM     |
| 58 | Form I | Succinic acid         | 2   | 2,2,2-Trifluoroethanol + Methyl tertiary butyl ether | NA                          | 25-30      | Form I |
| 59 | Form I | Succinic acid         | 1   | Methanol + Ethanol                                   | Ethyl acetate               | 25-30      | Form I |
| 60 | Form I | Succinic acid         | 2   | Acetonitrile                                         | Acetone                     | 35-40      | PM     |
| 61 | Form I | Maleic acid           | 1   | Methanol                                             | NA                          | 45-50      | PM     |
| 62 | Form I | Maleic acid           | 3   | Methanol                                             | Methyl tertiary butyl ether | 35-40      | PM     |
| 63 | Form I | Maleic acid           | 3   | Methanol                                             | 1,4-dioxane                 | 20-25      | Form I |
| 64 | Form I | Maleic acid           | 1   | Methanol                                             | Acetone                     | 45-50      | Form I |
| 65 | Form I | Maleic acid           | 1.2 | Methanol + Tetrahydrofuran                           | n-Heptane                   | 25-30      | Form I |
| 66 | Form I | Maleic acid           | 1   | Dimethyl carbonate                                   | NA                          | 25-30      | Form I |
| 67 | Form I | Maleic acid           | 1   | Ethyl acetate                                        | NA                          | 25-30      | PM     |
| 68 | Form I | Maleic acid           | 1   | Acetonitrile                                         | NA                          | 25-30      | Form I |
| 69 | Form I | Maleic acid           | 2   | Acetonitrile                                         | NA                          | 25-30      | PM     |
| 70 | Form I | Maleic acid           | 2   | Dimethyl formamide                                   | Dimethyl carbonate          | 50-55      | Form I |
| 71 | Form I | Maleic acid           | 2   | Dimethyl formamide                                   | Methyl tertiary             | 50-55      | Form I |

|    |                     |                        |       |                                      |                                       |         |        |
|----|---------------------|------------------------|-------|--------------------------------------|---------------------------------------|---------|--------|
|    |                     |                        |       |                                      | butyl ether                           |         |        |
| 72 | Form I              | Maleic acid            | 3     | Dimethyl sulfoxide                   | Methyl isobutyl ketone                | 50-55   | PM     |
| 73 | Form I              | Maleic acid            | 3     | Dimethyl sulfoxide                   | Ethyl acetate                         | 50-55   | PM     |
| 74 | Form I              | Maleic acid            | 3     | Dimethyl sulfoxide                   | Anisole                               | 50-55   | PM     |
| 75 | Form I              | Maleic acid            | 2     | Ethanol                              | NA                                    | 25-30   | PM     |
| 76 | Form I              | Maleic acid            | 1.2   | Ethanol                              | Heptane + Methyl tertiary butyl ether | 15-20   | Form I |
| 77 | Form I              | Maleic acid            | 2     | Ethanol                              | Water                                 | 0 - 5   | Form I |
| 78 | Form I              | Maleic acid            | 3     | Ethanol                              | Ethyl acetate                         | -5 to 0 | PM     |
| 79 | Amorphous           | Maleic acid            | 1.2   | Ethanol                              | NA                                    | 25-30   | Form I |
| 80 | Amorphous           | Maleic acid            | 2     | 2-ethoxy ethanol                     | NA                                    | 0-5     | Form I |
| 81 | Amorphous           | Maleic acid            | 2     | Acetonitrile                         | NA                                    | 70-75   | PM     |
| 82 | Amorphous           | Maleic acid            | 2     | Ethyl acetate + acetone              | NA                                    | 70-75   | PM     |
| 83 | Amorphous           | Maleic acid            | 1.2   | Ethanol + Methanol                   | Pentane                               | 25-30   | PM     |
| 84 | Amorphous           | Maleic acid            | 2     | Ethanol + Tetrahydrofuran + Methanol | Pentane                               | 25-30   | PM     |
| 85 | Niraparib free base | PTSA & Oxalic acid     | 1 & 2 | Ethanol + Acetonitrile               | NA                                    | 25-30   | Form I |
| 86 | Niraparib free base | PTSA & Maleic acid     | 1 & 1 | Ethanol                              | Ethyl acetate                         | 35-40   | Form I |
| 87 | Niraparib free base | PTSA & D-Tartaric acid | 1 & 1 | Ethyl acetate + Methanol             | NA                                    | 25-30   | PM     |
| 88 | Niraparib free base | PTSA & Succinic acid   | 1 & 1 | Ethanol                              | Ethyl acetate                         | 25-30   | Form I |
| 89 | Niraparib free base | PTSA & Succinic acid   | 1 & 2 | Acetonitrile + Ethanol               | NA                                    | 25-30   | PM     |
| 90 | Niraparib free base | PTSA & Fumaric acid    | 1 & 1 | Acetonitrile + Ethanol               | NA                                    | 35-40   | Form I |
| 91 | Niraparib free base | PTSA & L-Malic acid    | 1 & 1 | Ethanol                              | Ethyl acetate                         | 35-40   | Form I |

|     |        |           |     |                         |                 |       |                             |
|-----|--------|-----------|-----|-------------------------|-----------------|-------|-----------------------------|
| 92  | Form I | L-Proline | 1   | Methanol                | NA              | 25-30 | Form I                      |
| 93  | Form I | L-Proline | 1   | Acetonitrile            | NA              | 40-45 | PM                          |
| 94  | Form I | L-Proline | 1   | Methanol                | Acetonitrile    | 25-30 | PM                          |
| 95  | Form I | L-Proline | 1   | Methanol                | Petroleum ether | 0-10  | Form III                    |
| 96  | Form I | L-Proline | 2   | Acetone + Water         | NA              | 45-50 | Form I                      |
| 97  | Form I | L-Proline | 2   | Acetonitrile + Water    | NA              | 70-75 | Form I                      |
| 98  | Form I | L-Proline | 2   | Tetrahydrofuran + Water | NA              | 45-50 | Form I                      |
| 99  | Form I | L-Proline | 1.2 | Methanol                | NA              | 50-55 | PM of Form I & NIR.TO S.PRO |
| 100 | Form I | L-Proline | 1.2 | Methanol                | Acetonitrile    | 50-55 | PM of Form I & NIR.TO S.PRO |
| 101 | Form I | L-Proline | 1.2 | 2,2,2-Trifluoroethanol  | Acetonitrile    | 70-75 | NIR.TO S.PRO                |
| 102 | Form I | L-Proline | 1.2 | Methanol                | Acetonitrile    | 70-75 | NIR.TO S.PRO                |
| 103 | Form I | L-Proline | 1.2 | Acetonitrile            | NA              | 70-75 | NIR.TO S.PRO                |

**Note:** In the above table, niraparib tosylate monohydrate is mentioned as Form I. PM stands for physical mixture of Form I and respective coformer. NIR.TOS.PRO stands for niraparib tosylate L-proline zwitterionic salt-cocrystal. In few experiments, Form III or physical mixture of Form I and Form III were observed during in-process PXRD analysis, however they eventually converted to the stable Form I after final filtration or drying. The experimental NIR.TOS.PRO hits are highlighted in violet colour.

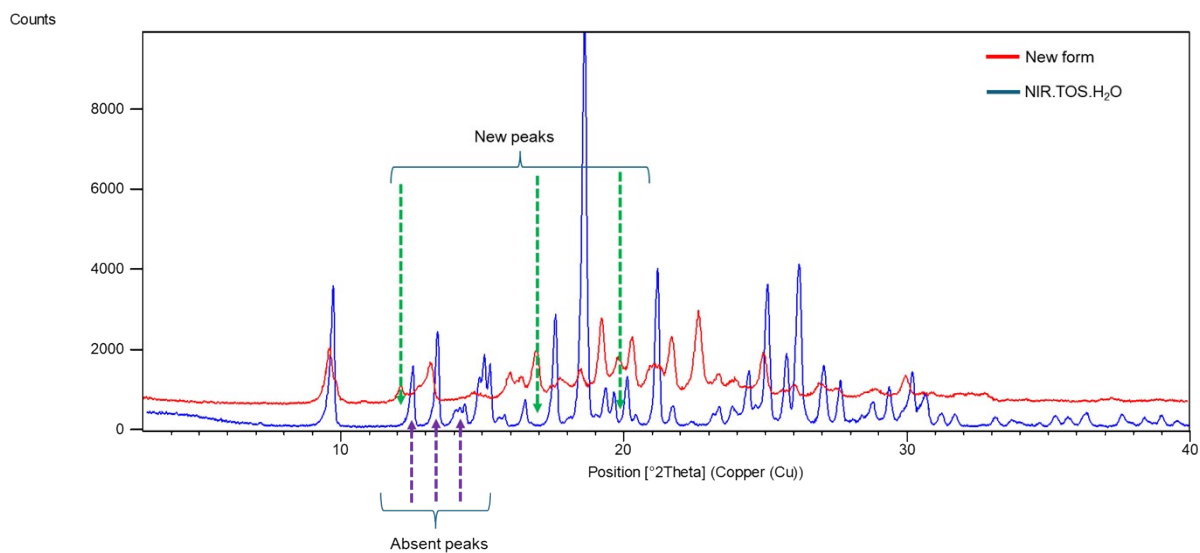

**Figure S4:** PXRD pattern of new polymorph in comparison with NIR.TOS.H<sub>2</sub>O.

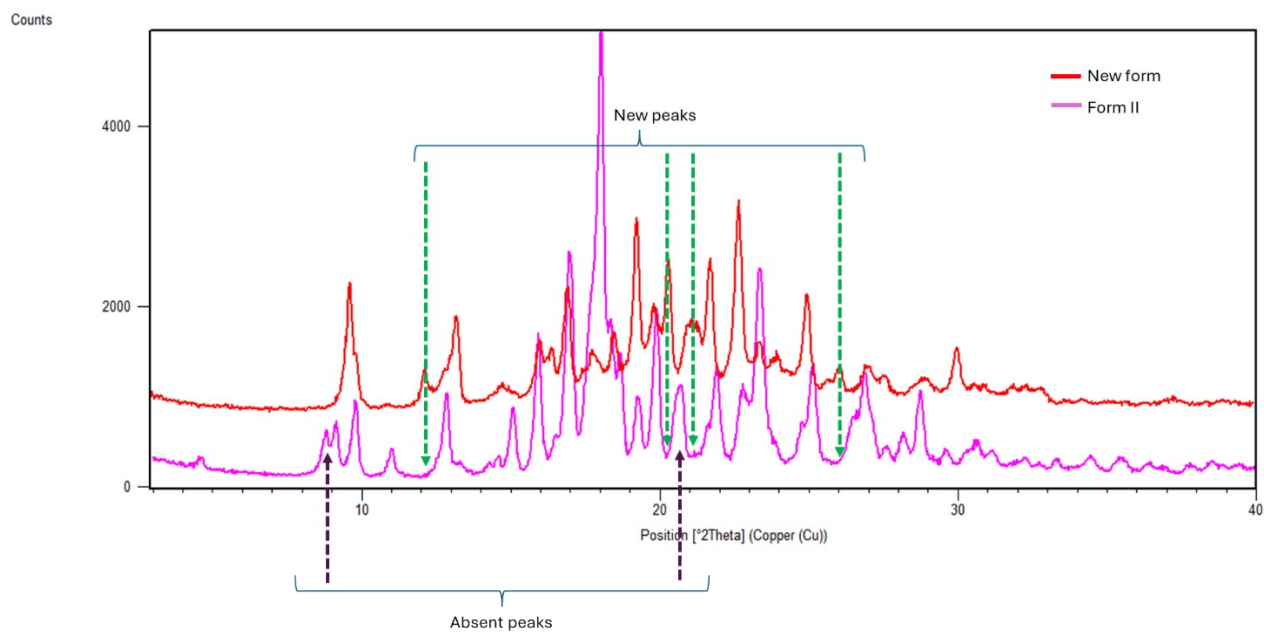

**Figure S5:** PXRD pattern of new polymorph in comparison with Form II of Niraparib tosylate.

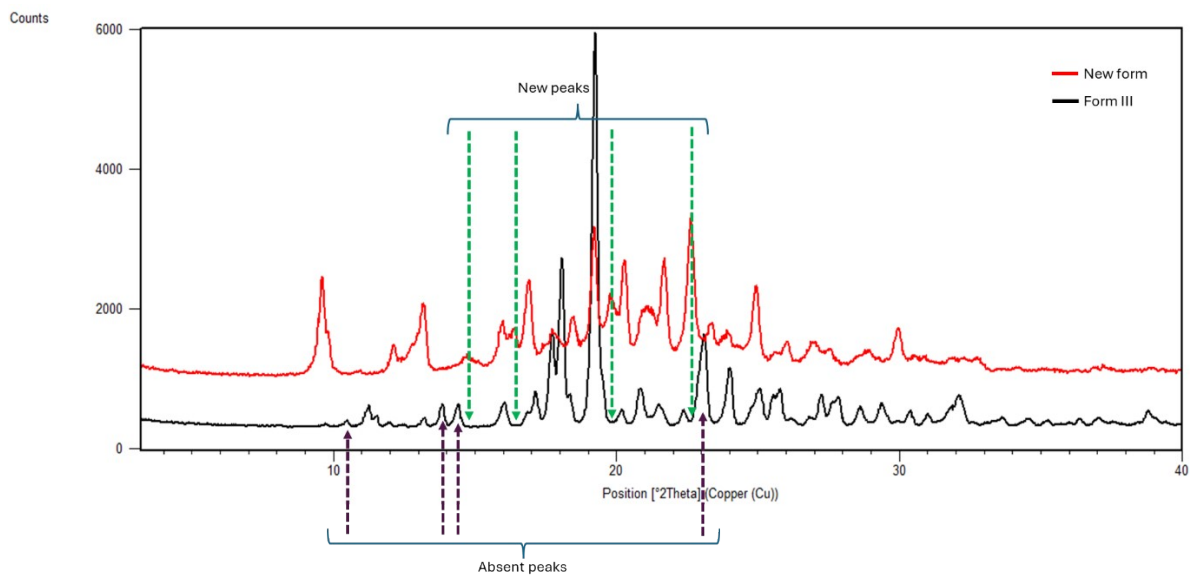

**Figure S6:** PXRD pattern of new polymorph in comparison with Form III of Niraparib tosylate.

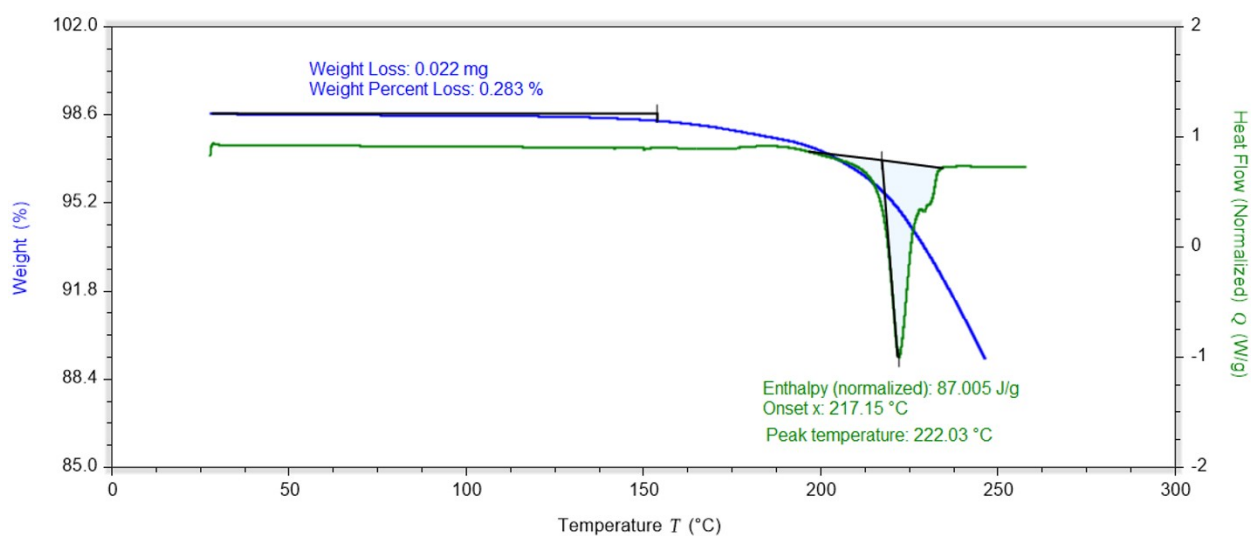

**Figure S7:** DSC & TGA overlay of new polymorph of Niraparib tosylate.



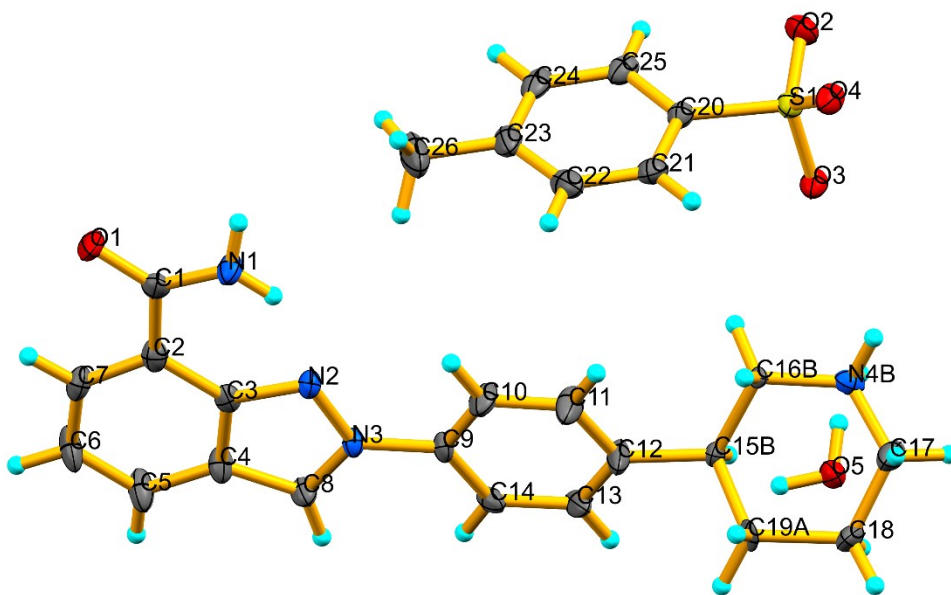

**Figure S8.** ORTEP representation of NIR.TOS.H<sub>2</sub>O drawn at 50% probability of non-hydrogen atoms. The piperidyl ring in Niraparib has disorder, which is omitted for clarity.

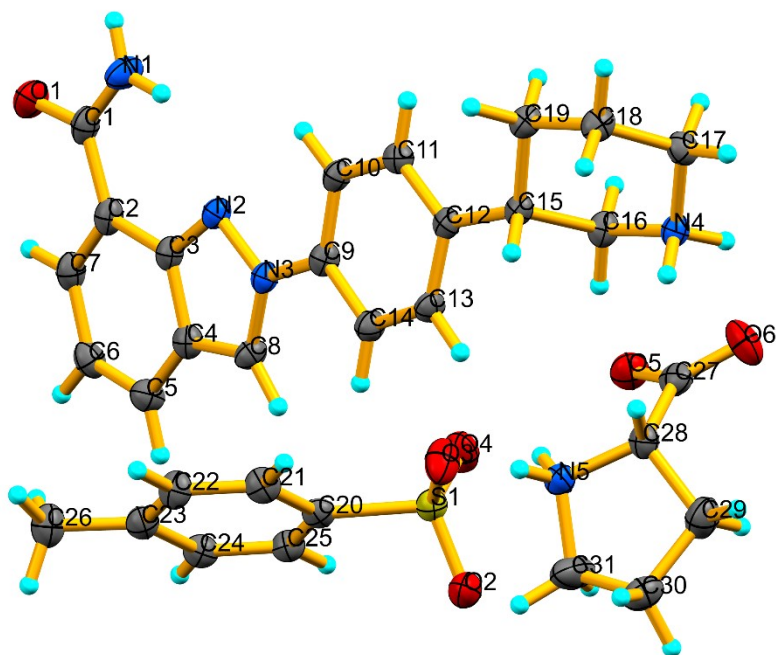

**Figure S9.** ORTEP representation of NIR.TOS.PRO drawn at 50% probability of non-hydrogen atoms.

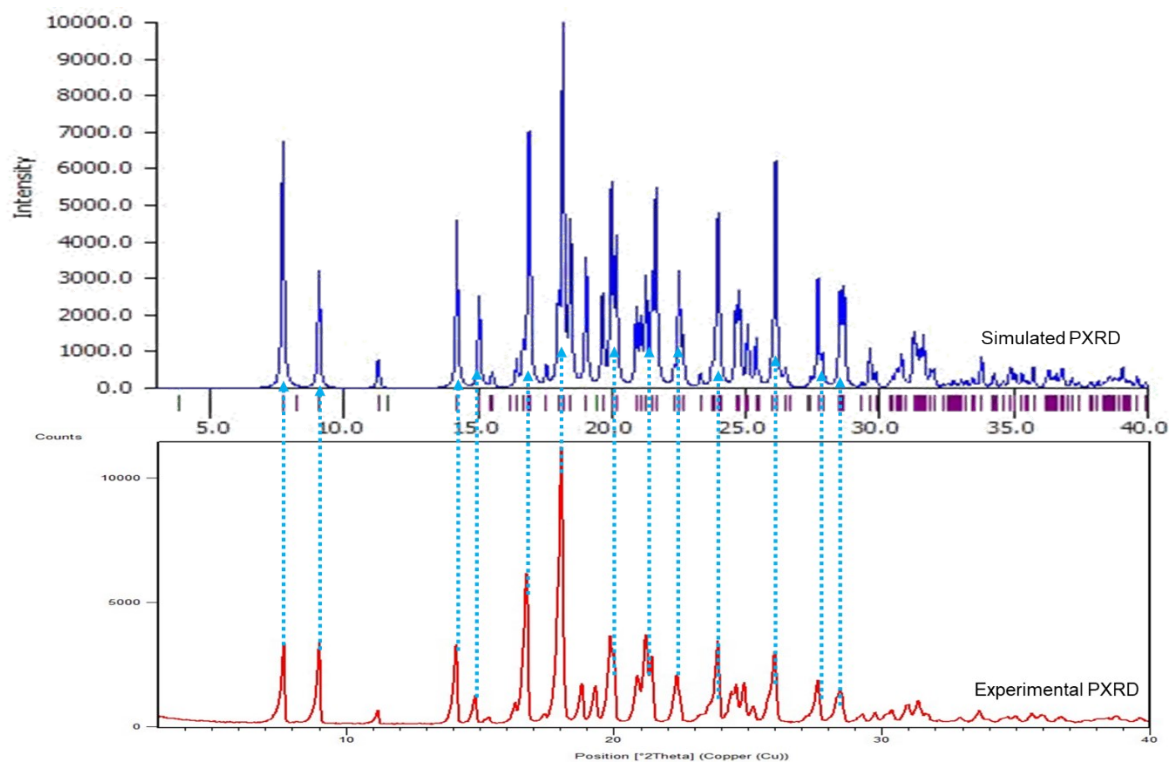

**Figure S10.** Experimental and simulated PXRD patterns of NIR.TOS.PRO with one-to one correspondence.

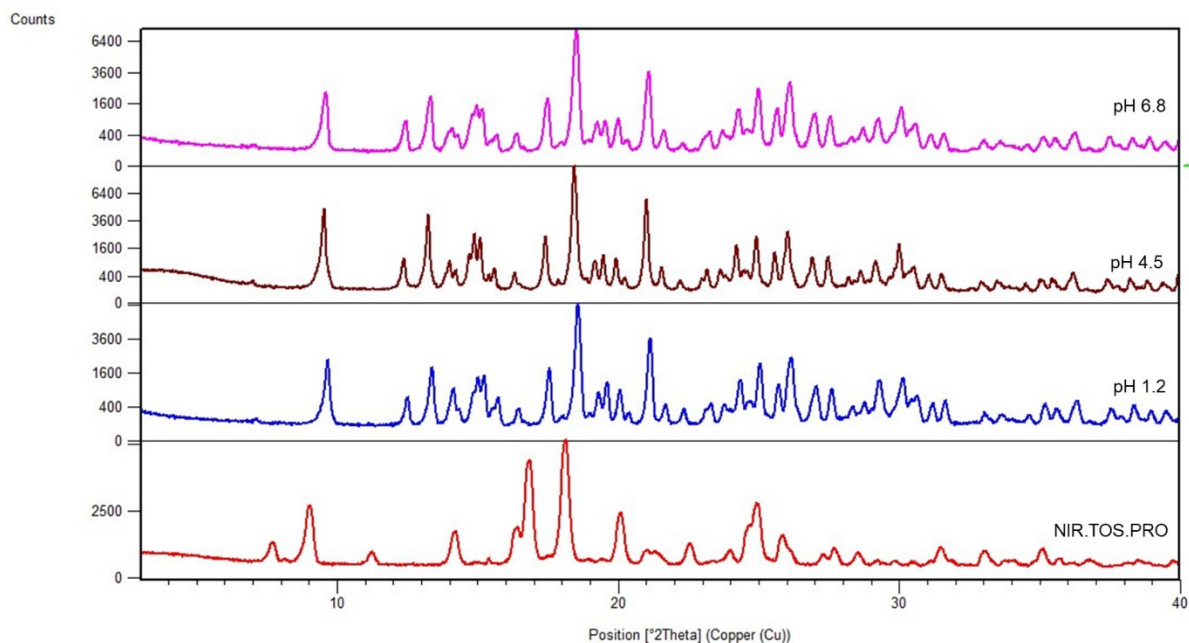

**Figure S11:** Powder X-ray diffraction patterns of NIR.TOS.PRO (red pattern) in pH 1.2 (blue), 4.5 (brown) and 6.8 (pink) buffers (characterized with the residue after dissolution experiment). The salt-cocystal is dissociated in all the media and converted to NIR.TOS.H<sub>2</sub>O.

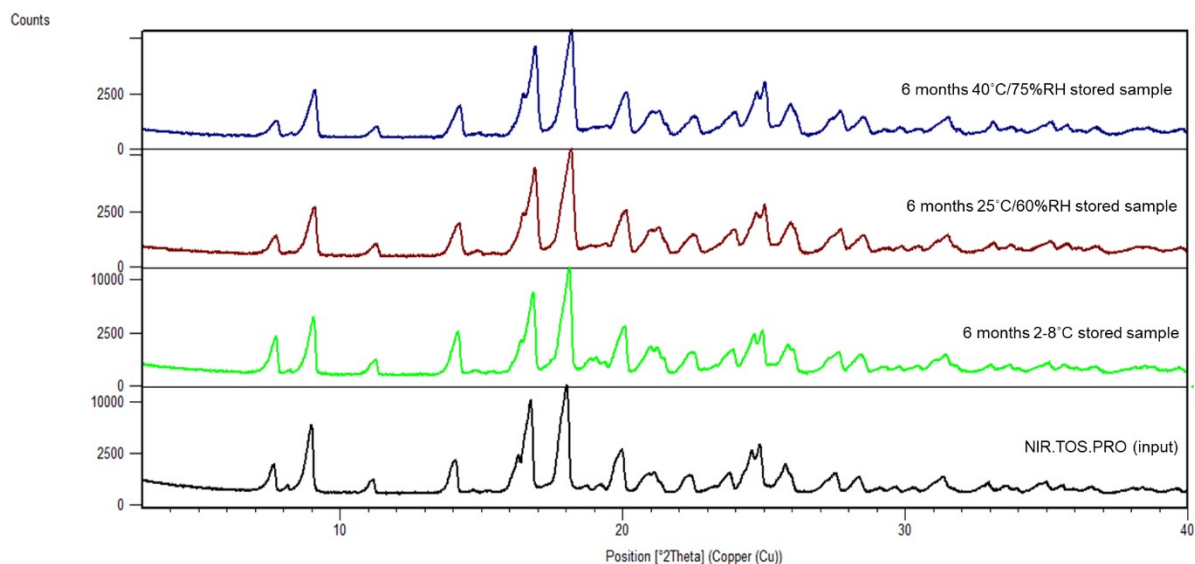

**Figure S12:** Overlay of powder X-ray diffraction patterns of 6-months stored stability samples of NIR.TOS.PRO in comparison with the input.

**Table S3:** Torsion angles that are majorly deviated in NIR.TOS.H<sub>2</sub>O and NIR.TOS.PRO.

| Considered consecutive atoms | NIR.TOS.H <sub>2</sub> O | NIR.TOS.PRO |
|------------------------------|--------------------------|-------------|
| C12-C15-C16-N4 ( $\tau_1$ )  | 177.16°                  | -171.03°    |
| C12-C15-C19-C18 ( $\tau_2$ ) | 52.45°                   | 175.96°     |

**Table S4:** Hydrogen bond parameters of NIR.TOS.H<sub>2</sub>O and NIR.TOS.PRO.

| Interaction                   | D-H/Å    | H...A/Å  | D...A/Å  | $\angle$ D-H...A/° | Symmetry code    |
|-------------------------------|----------|----------|----------|--------------------|------------------|
| <b>NIR.TOS.H<sub>2</sub>O</b> |          |          |          |                    |                  |
| N4B-H4BA...O1                 | 0.92     | 2.13     | 2.98(9)  | 152                | 1-x, 2-y, 1-z    |
| N1-H1A...O4                   | 0.84(11) | 2.22(11) | 2.93(7)  | 143(10)            | 1-x, 2-y, 1-z    |
| N4B-H4BB...O5                 | 0.92     | 2.06     | 2.95(9)  | 162                | 1-x, 2-y, 1-z    |
| N4A-H4AA...O5                 | 0.92     | 1.88     | 2.75(9)  | 158                | 1-x, 2-y, 1-z    |
| N4A-H4AB...O5                 | 0.92     | 1.91     | 2.83(9)  | 175                | x, y, z          |
| O5-H5A...N4A                  | 0.85     | 2.12     | 2.75(9)  | 131                | 1+x, y, z        |
| O5-H5B...O3                   | 0.85     | 1.93     | 2.76(5)  | 163                | x, y, z          |
| C16A-H16D...O2                | 0.99     | 2.60     | 3.57(18) | 168                | x, y, z          |
| C17-H17D...O1                 | 0.99     | 2.40     | 3.27(9)  | 146                | 1-x, 2-y, 1-z    |
| <b>NIR.TOS.PRO</b>            |          |          |          |                    |                  |
| N1-H1A...O6                   | 0.83(3)  | 2.05(3)  | 2.87(3)  | 174(3)             | 1-x, -1/2+y, 2-z |
| N4-H4A...O1                   | 0.92     | 1.88     | 2.69(3)  | 145                | 1-x, -1/2+y, 1-z |
| N4-H4B...O5                   | 0.92     | 1.87     | 2.78(3)  | 166                | x, y, z          |
| N5-H5A...O4                   | 0.92     | 1.80     | 2.70(3)  | 167                | x, y, z          |
| C8-H8...O3                    | 0.95     | 2.55     | 3.50(3)  | 177                | 1-x, -1/2+y, 1-z |
| C26-H26C...O6                 | 0.98     | 2.57     | 3.53(4)  | 165                | 2-x, -1/2+y, 1-z |
